# Supplementary material for: Evaluation of the immunoprotective capacity of five vaccine candidate proteins against avian necrotic enteritis and impact on the caecal microbiota of vaccinated birds
Source: Preprints.org preprint supplement (doi:10.20944/preprints202309.1988.v1), 2023-09-28
Supplement: Supplementary file 1 [file supplementary]

Supporting Information

a

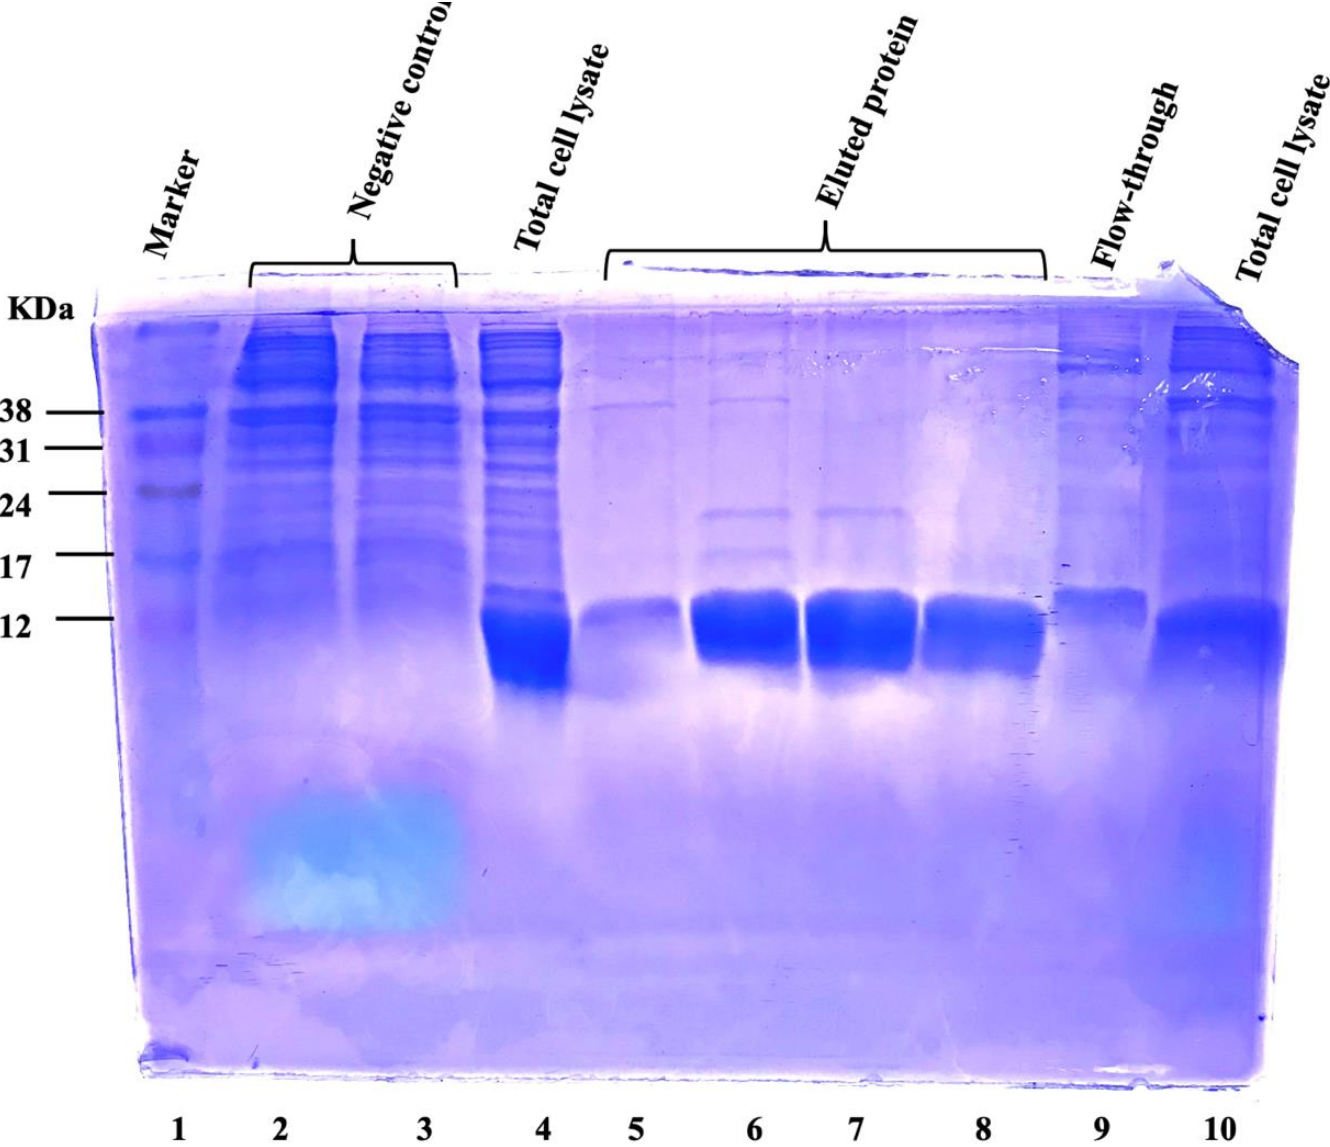

**b**

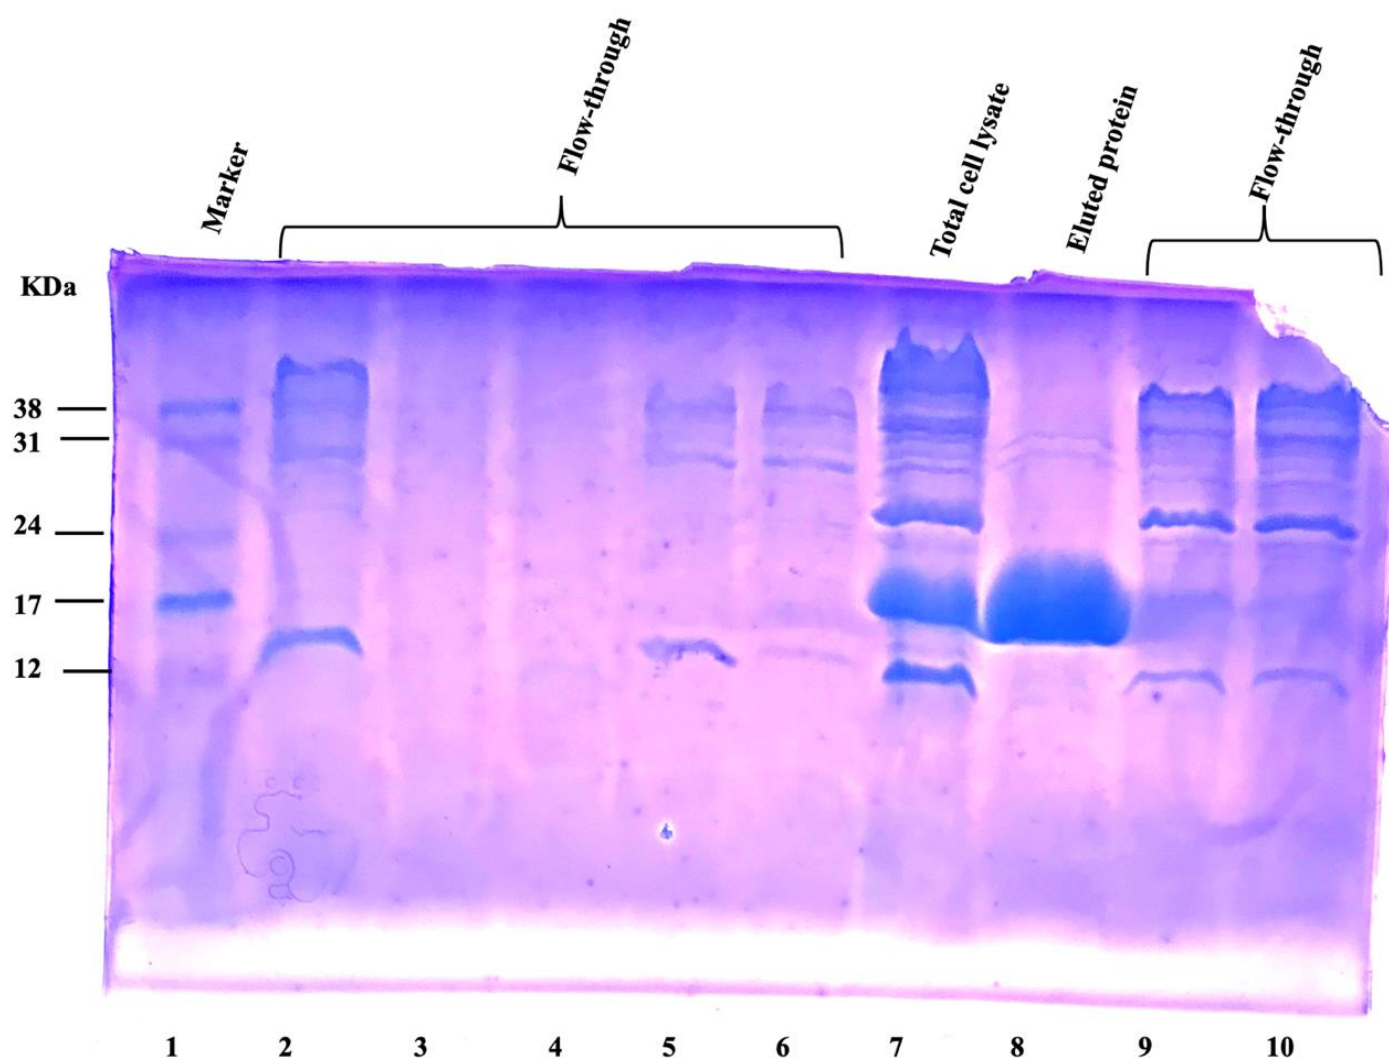

c

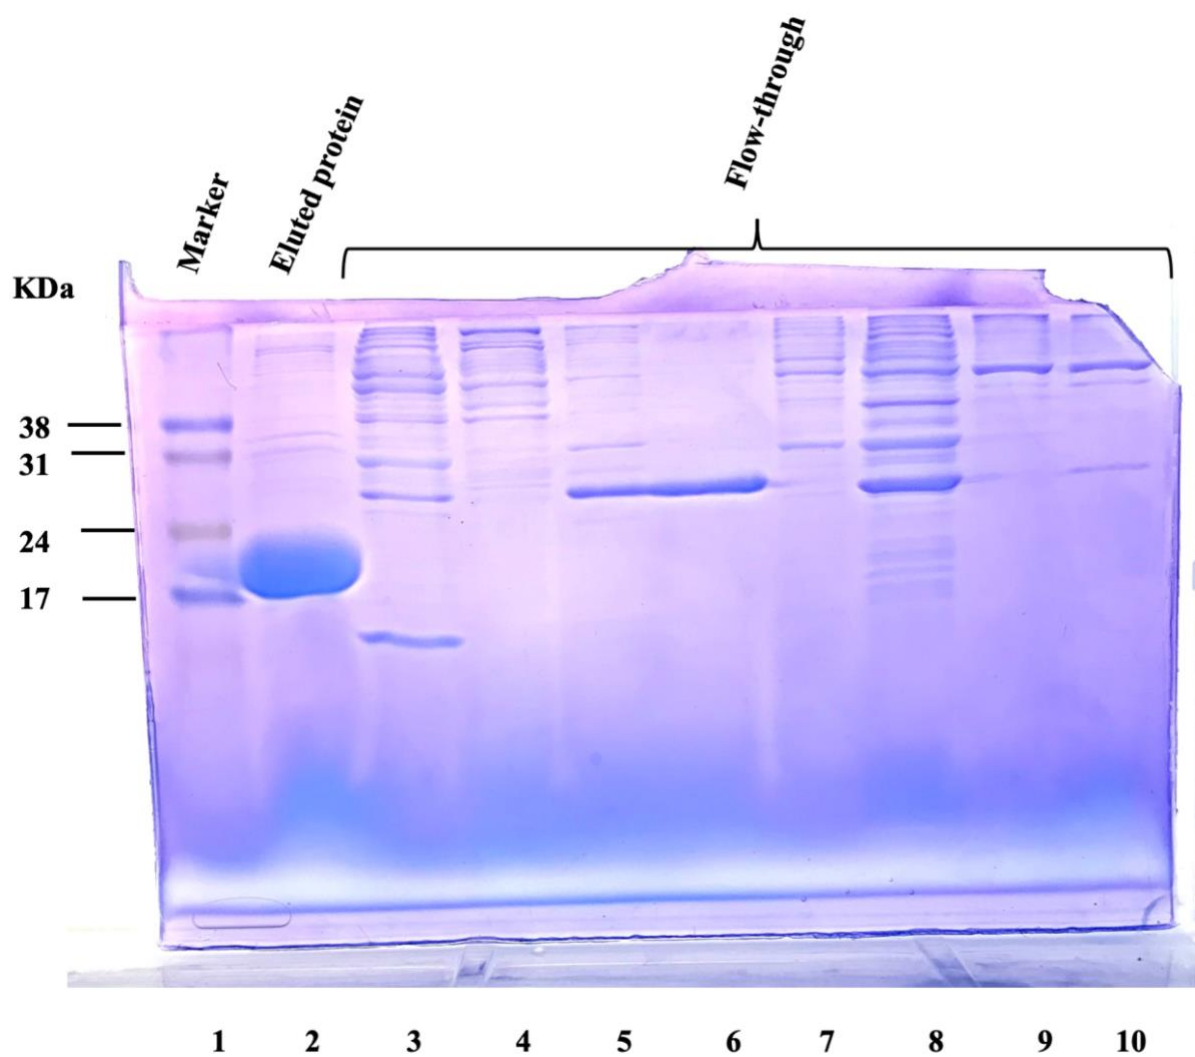

d

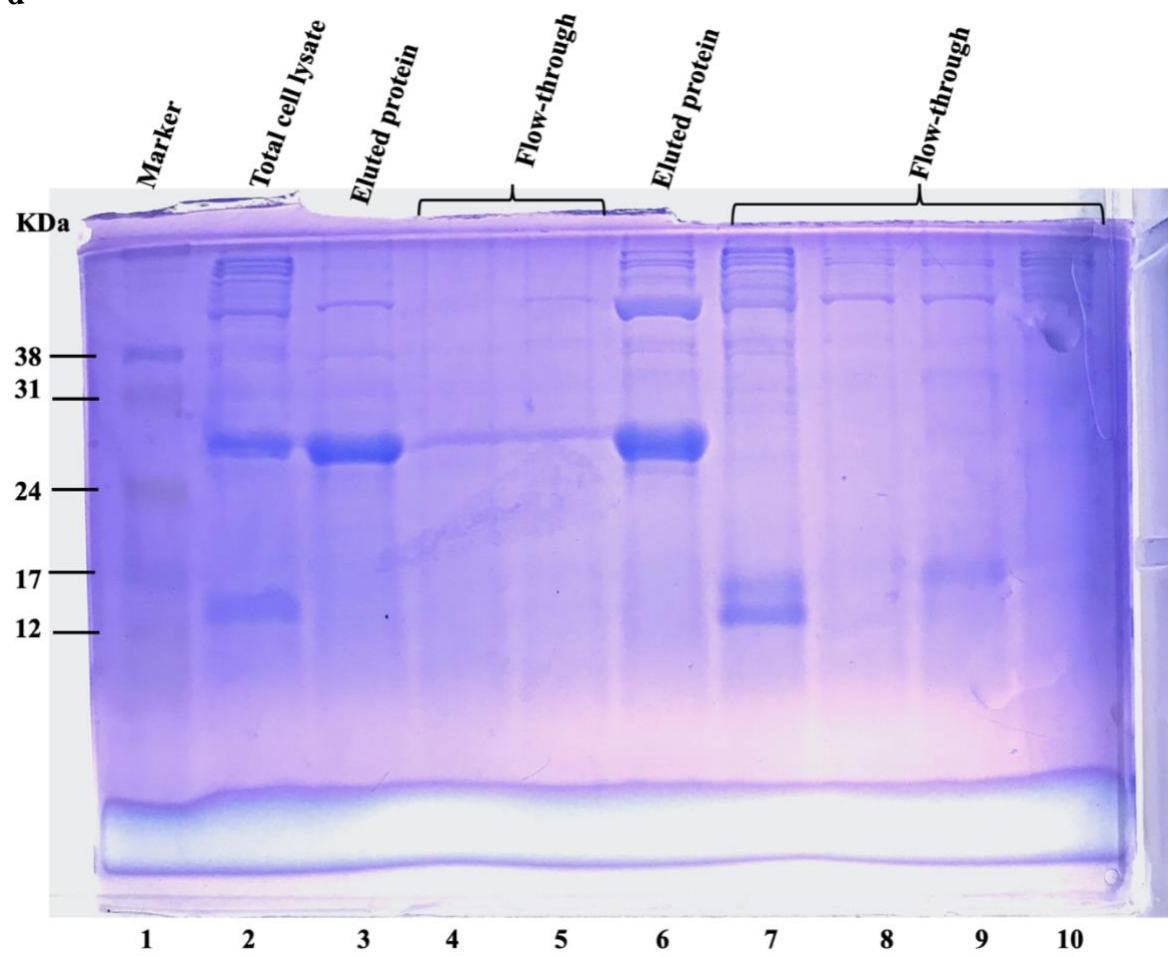

e

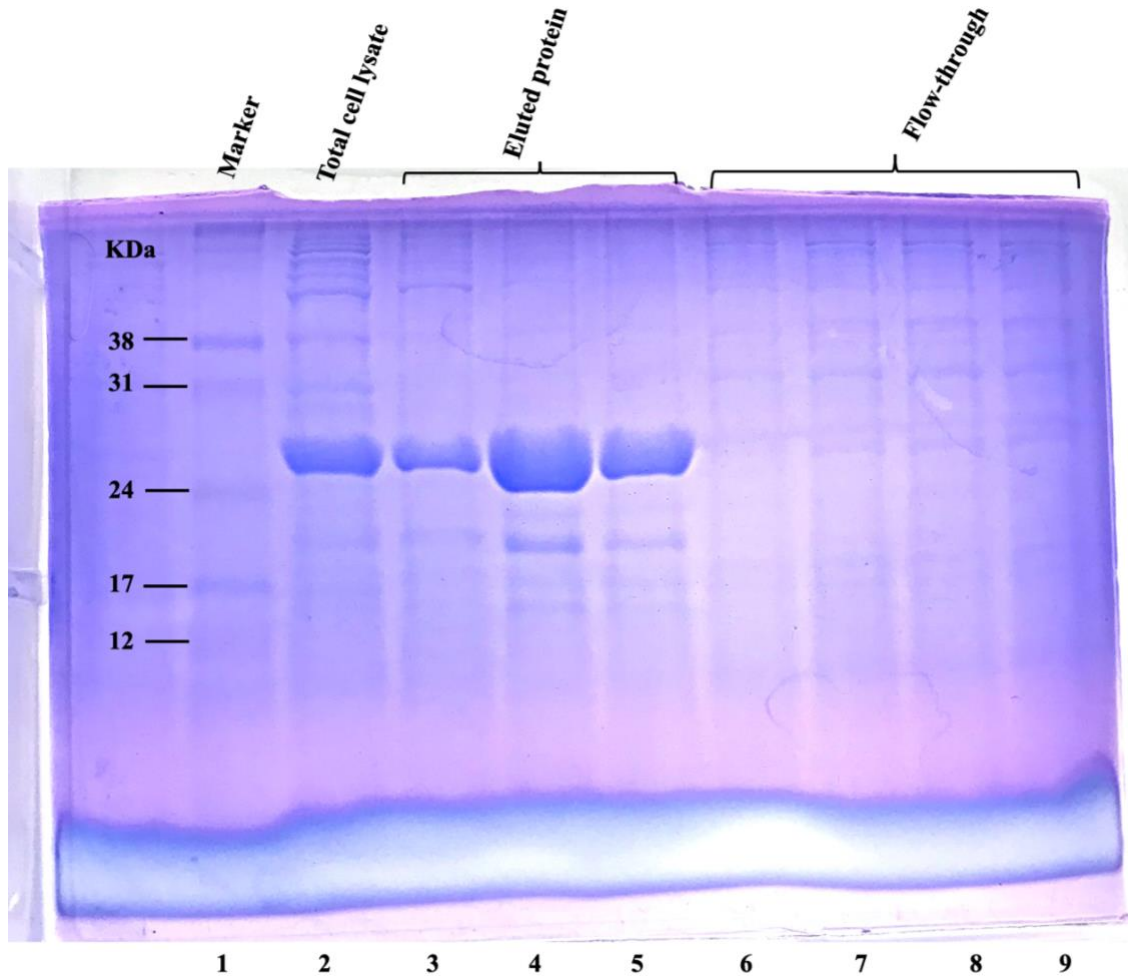

**Figure S1:** Coomassie blue stained SDS-PAGE gel showing purification of His-tagged recombinant proteins by Ni-NTA affinity chromatography. 15  $\mu$ L of crude *E. coli* extract and fractions of a) P153, b) P264, c) P509, d) P537, and e) P561 were loaded onto 15% SDS-polyacrylamide gels. The size of the protein of interest is 4 kDa higher than the predicted size due to the insertion of V5 and His-tag at N-terminal. Negative control sample in **Figure S1.a** corresponds to crude cell lysate from BL21 cells that were transformed with pET empty vector.

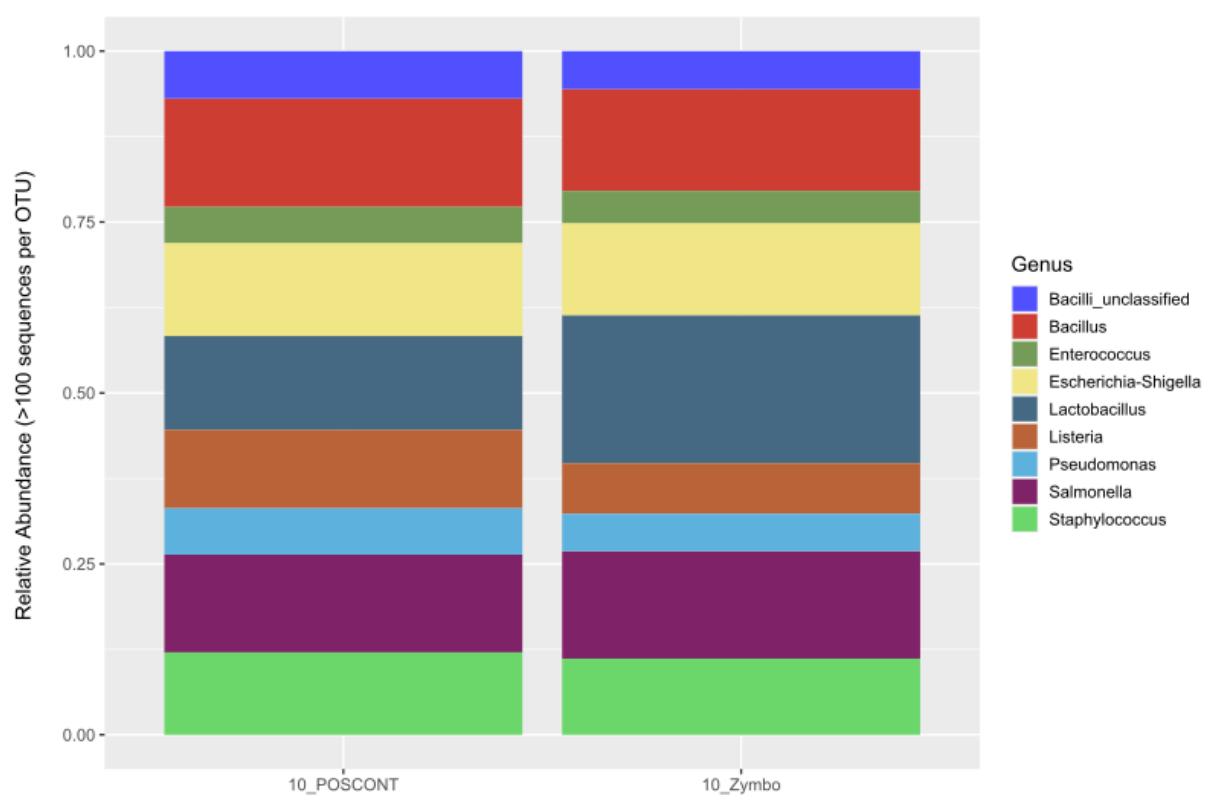

**Figure S2:** Stacked bar-plots showing the relative abundance of the major bacterial genera in positive controls.

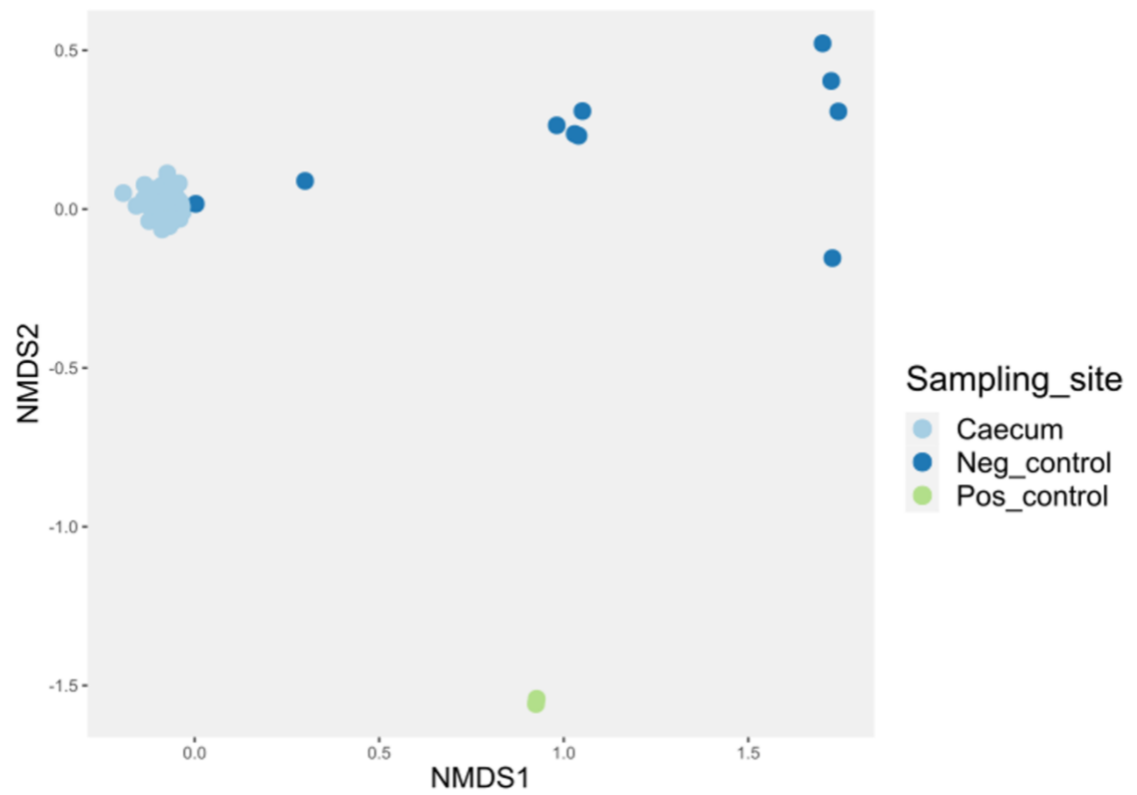

**Figure S3:** Non-metric multidimensional scaling plot (NMDS) showing the dissimilarity between cecum samples and controls using Bray–Curtis index.



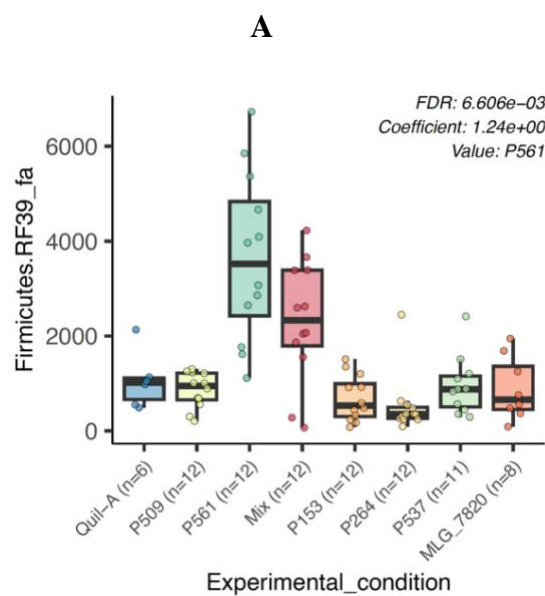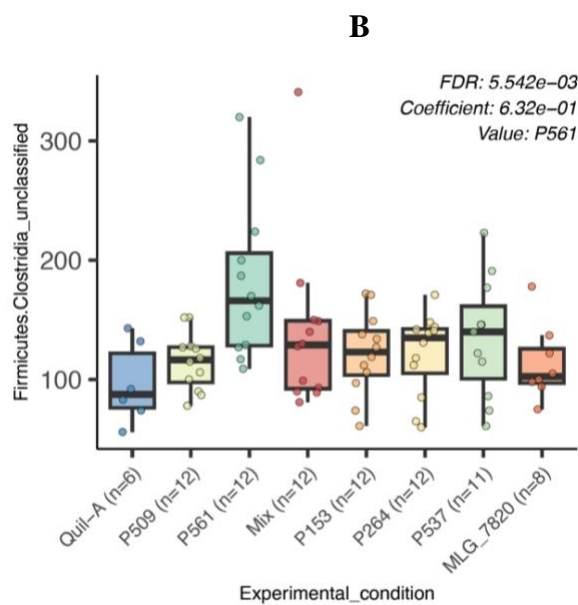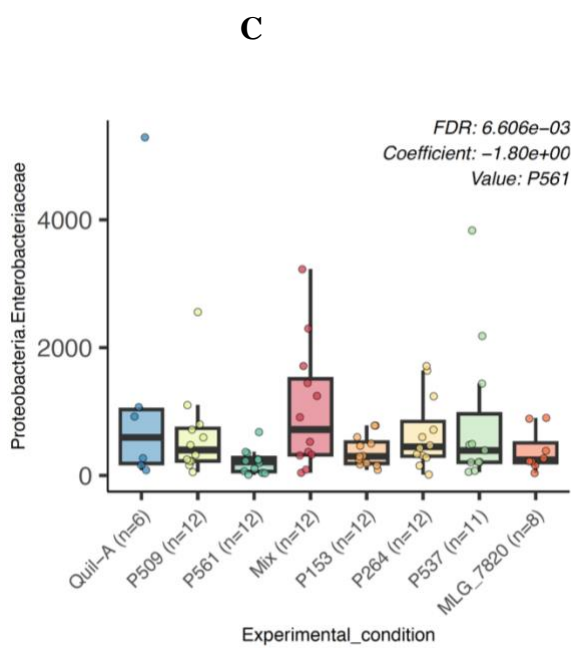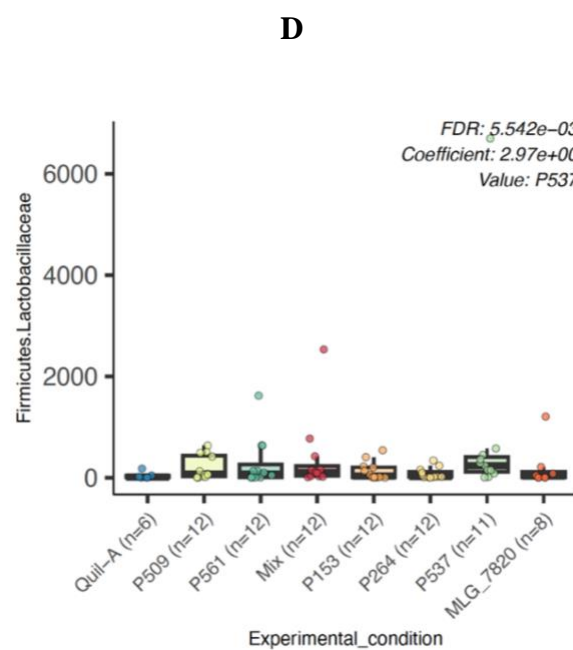



**E**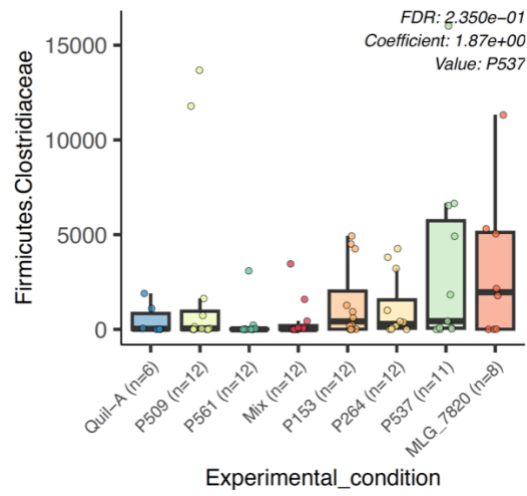**F**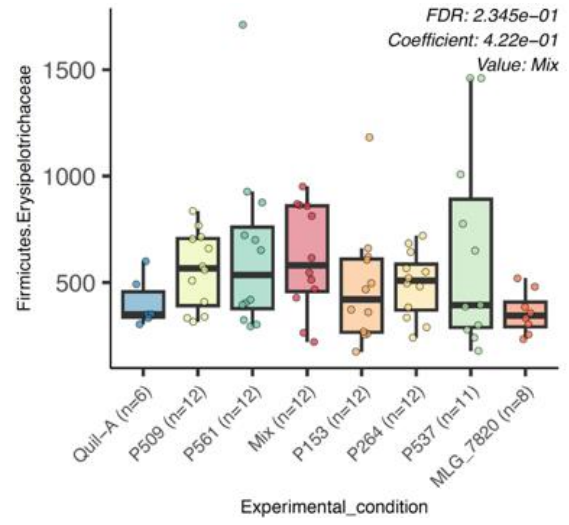**G**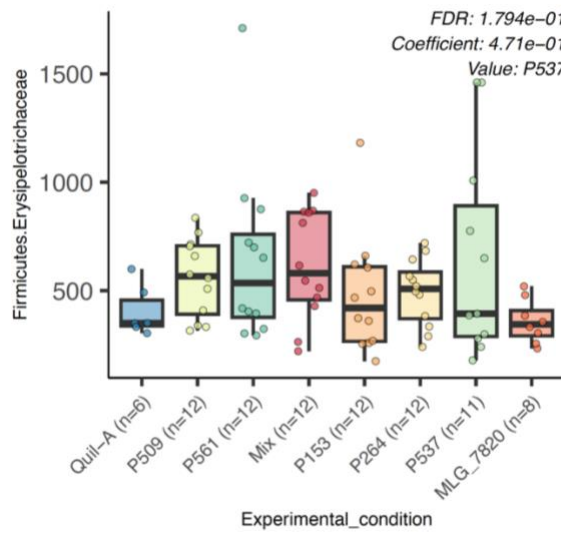**H**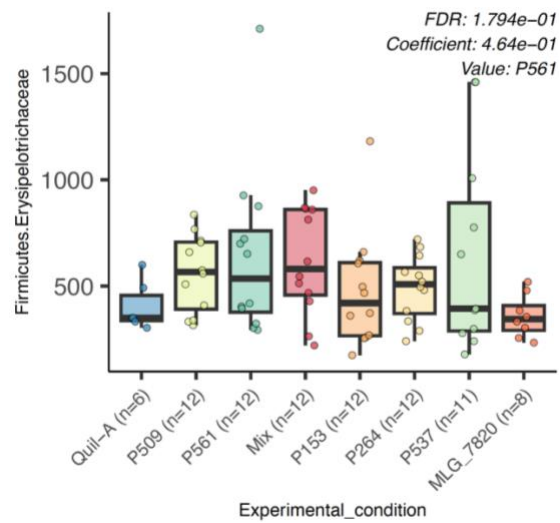

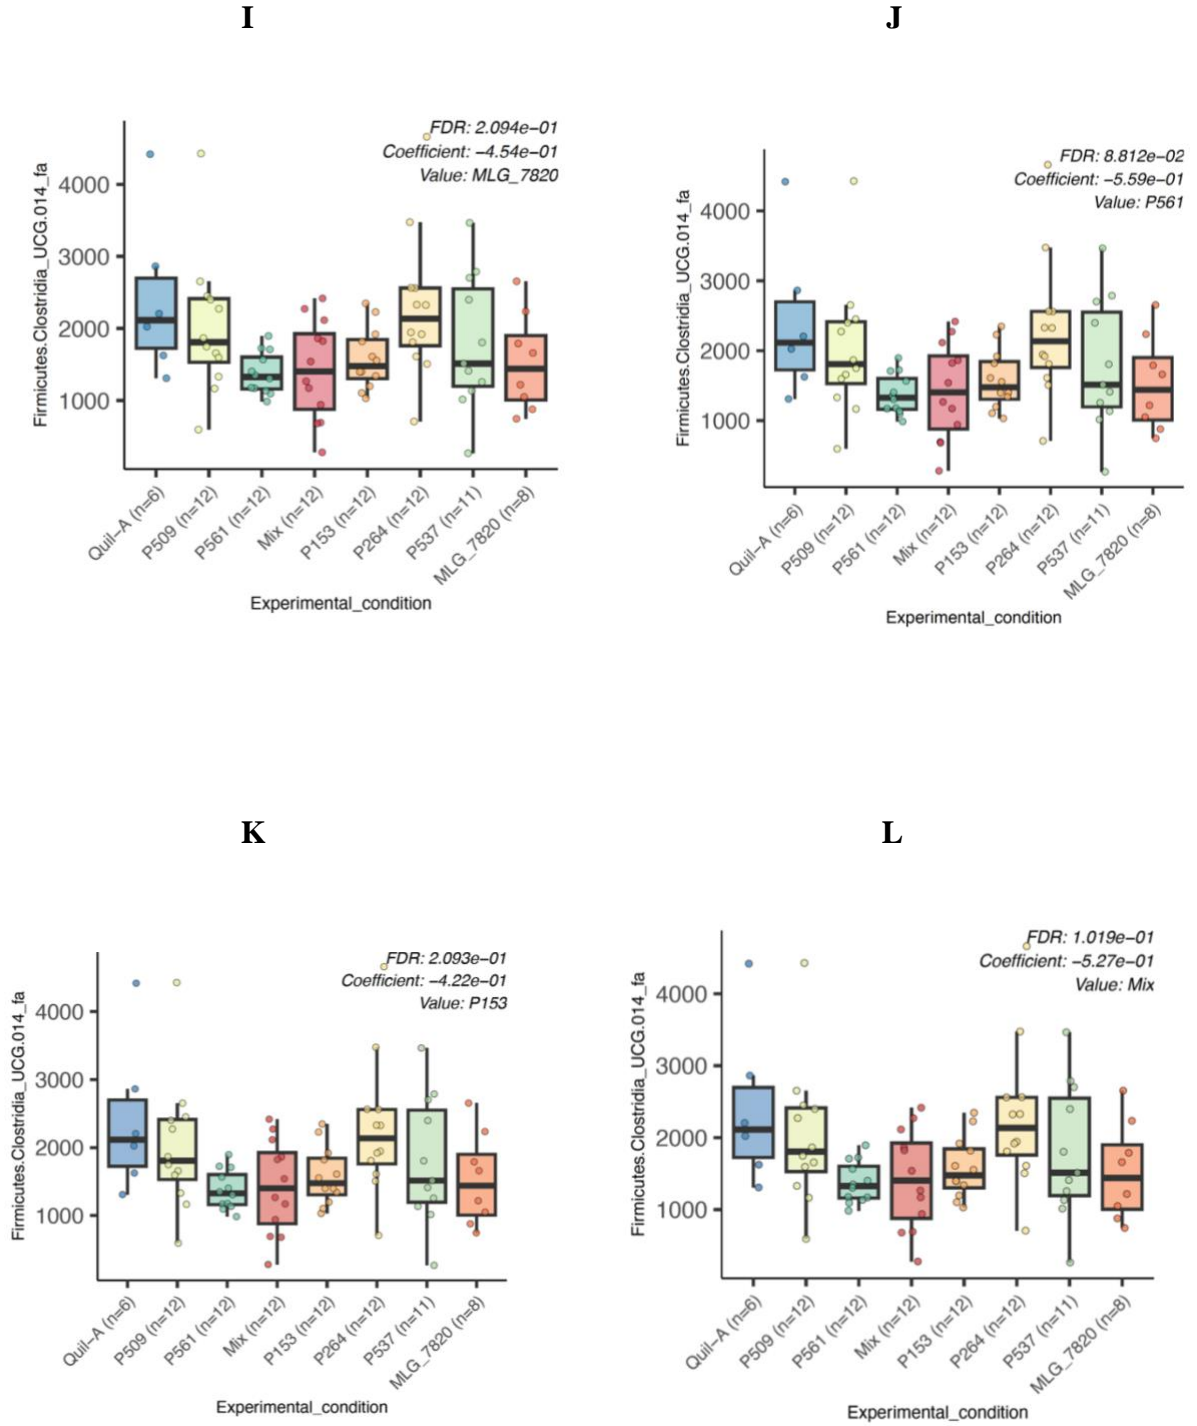

**Figure S4.** Statistically significant changes ( $p$ -value  $< 0.05$ ) in key bacterial families of interest across experimental groups.

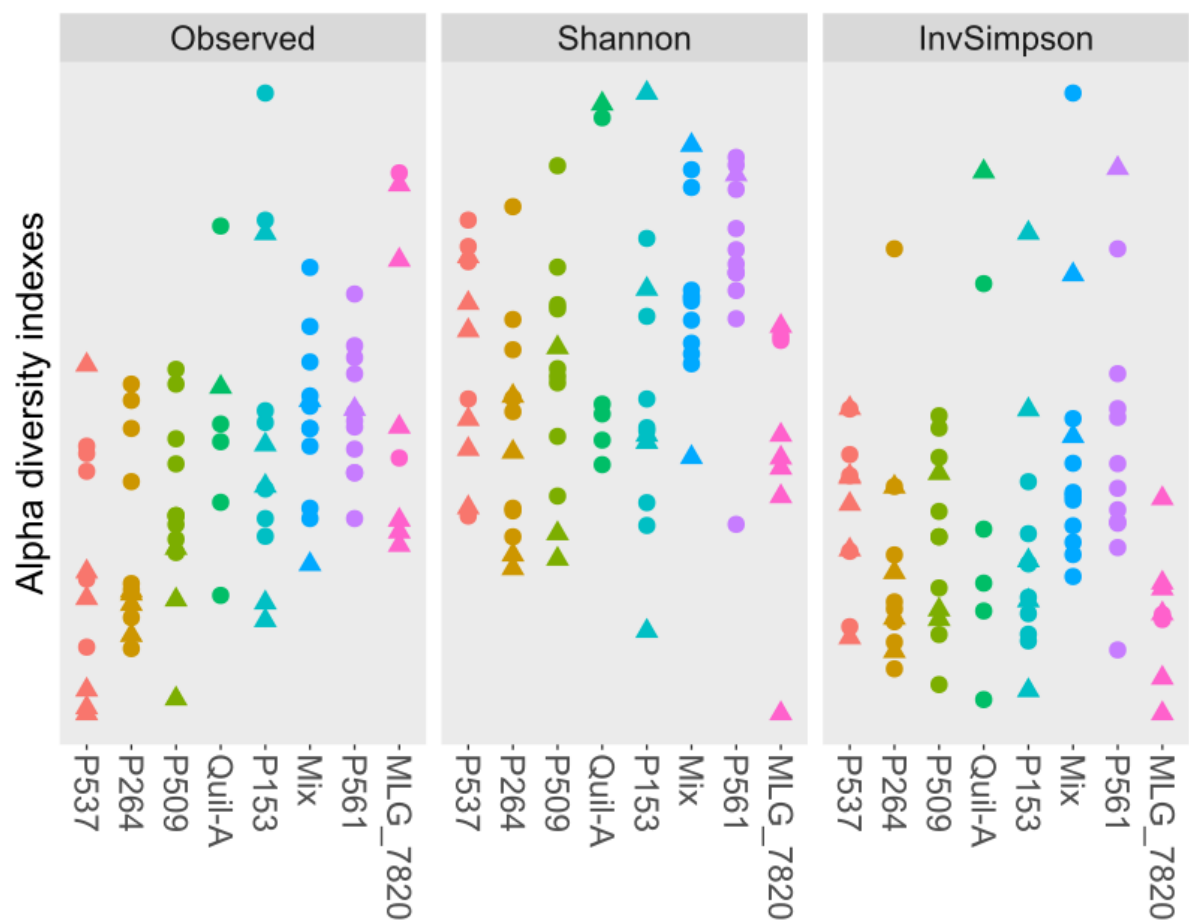

**Figure S5.** Alpha diversity measures among the samples at day 33, using Observed, Shannon, and Inverse Simpson indices.
